# Supplementary material for: Effects of passages through an insect or a plant on virulence and physiological properties of the fungus Metarhizium robertsii
Source: PeerJ journal article supplement (doi:10.7717/peerj.15726), 2023-08-11

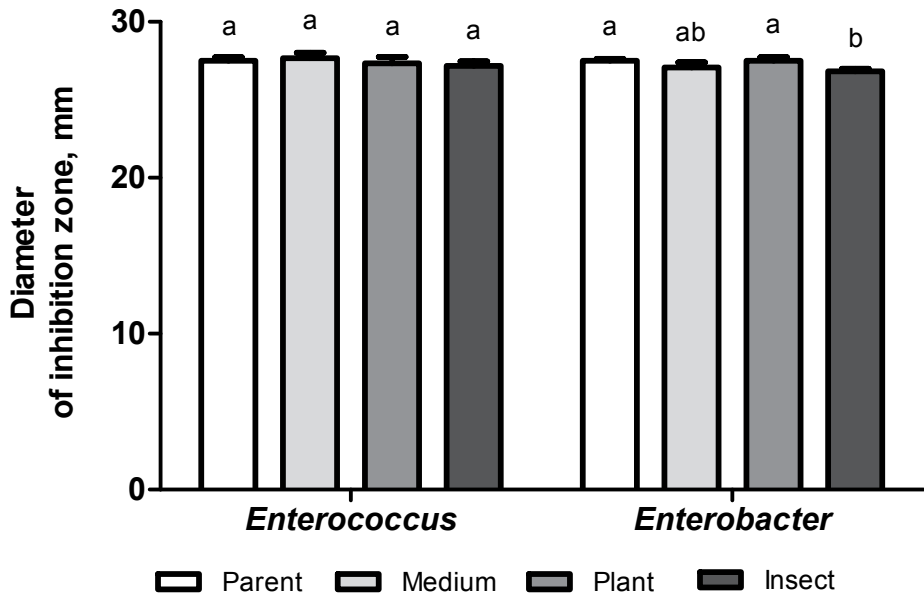

Supplement: Figure_S4.pdf [file Figure_S4.pdf]
